# Supplementary material for: Controllable synthesis of InTaO4 catalysts of different morphologies using a versatile sol precursor for photocatalytic evolution of H2
Source: Royal Society of Chemistry journal article supplement (doi:10.1039/c5ra03638k), 2015-01-01
Supplement: c5ra03638k1.pdf [file c5ra03638k1.pdf]

## Supporting Information

### Controllable synthesis of InTaO<sub>4</sub> catalysts with different morphologies using a versatile sol precursor for photocatalytic evolution of H<sub>2</sub>

Gui-Sheng Zeng, Jian Yu, Hong-Yun Zhu, Hui-Long Liu, Qiu-Ju Xing, Shao-Kui Bao, Shun He, Jian-Ping Zou,\* Chak-Tong Au

**Table S1.** Brunauer-Emmett-Teller (BET) surface areas of the as-synthesized catalysts.

| Samples                                                     | BET (m <sup>2</sup> /g) |
|-------------------------------------------------------------|-------------------------|
| InTaO <sub>4</sub> nanoparticles                            | 3.1405                  |
| SiO <sub>2</sub> @InTaO <sub>4</sub> core-shell nanospheres | 2.9093                  |
| InTaO <sub>4</sub> nanofibers                               | 4.1579                  |

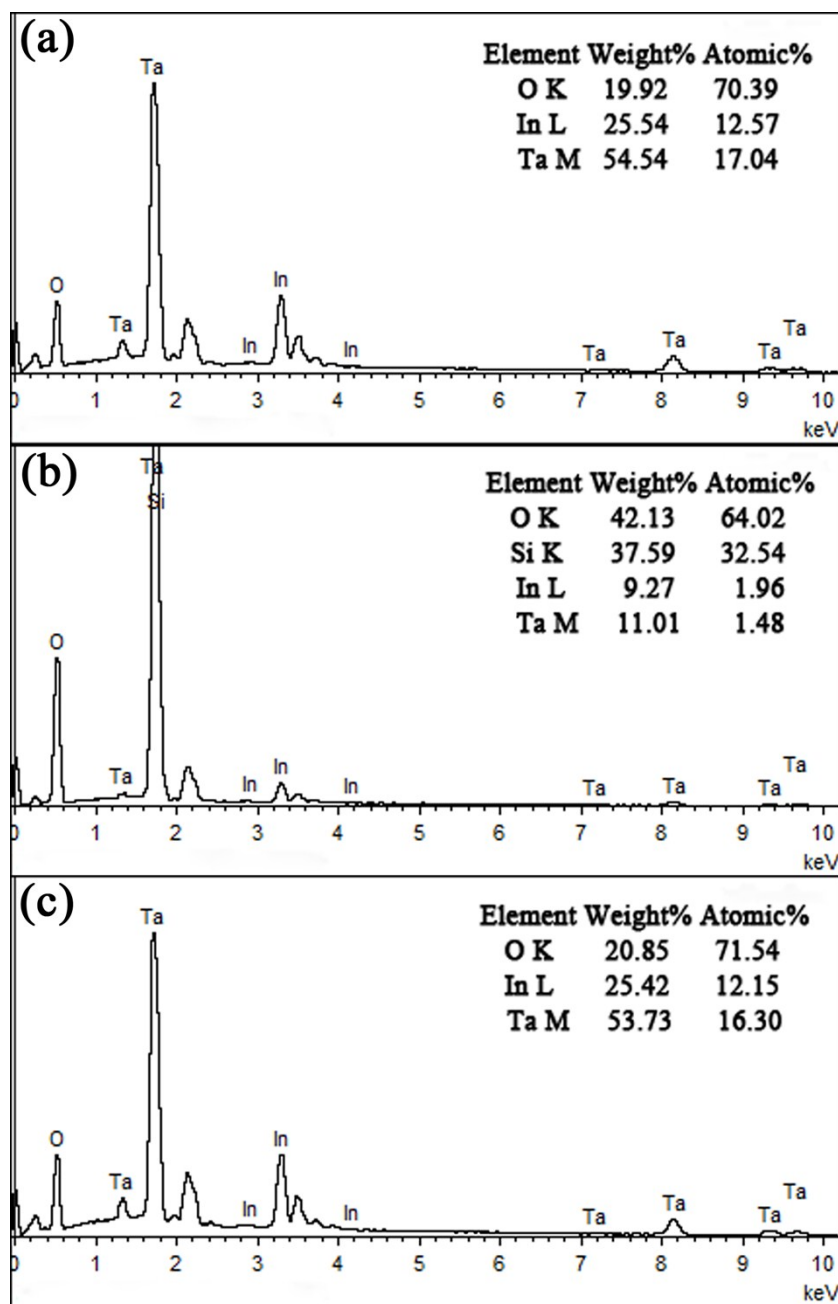

**Fig. S1.** EDS spectra of (a) InTaO<sub>4</sub> nanoparticles, (b) SiO<sub>2</sub>@InTaO<sub>4</sub> core-shell nanospheres, and (c) InTaO<sub>4</sub> nanofibers.

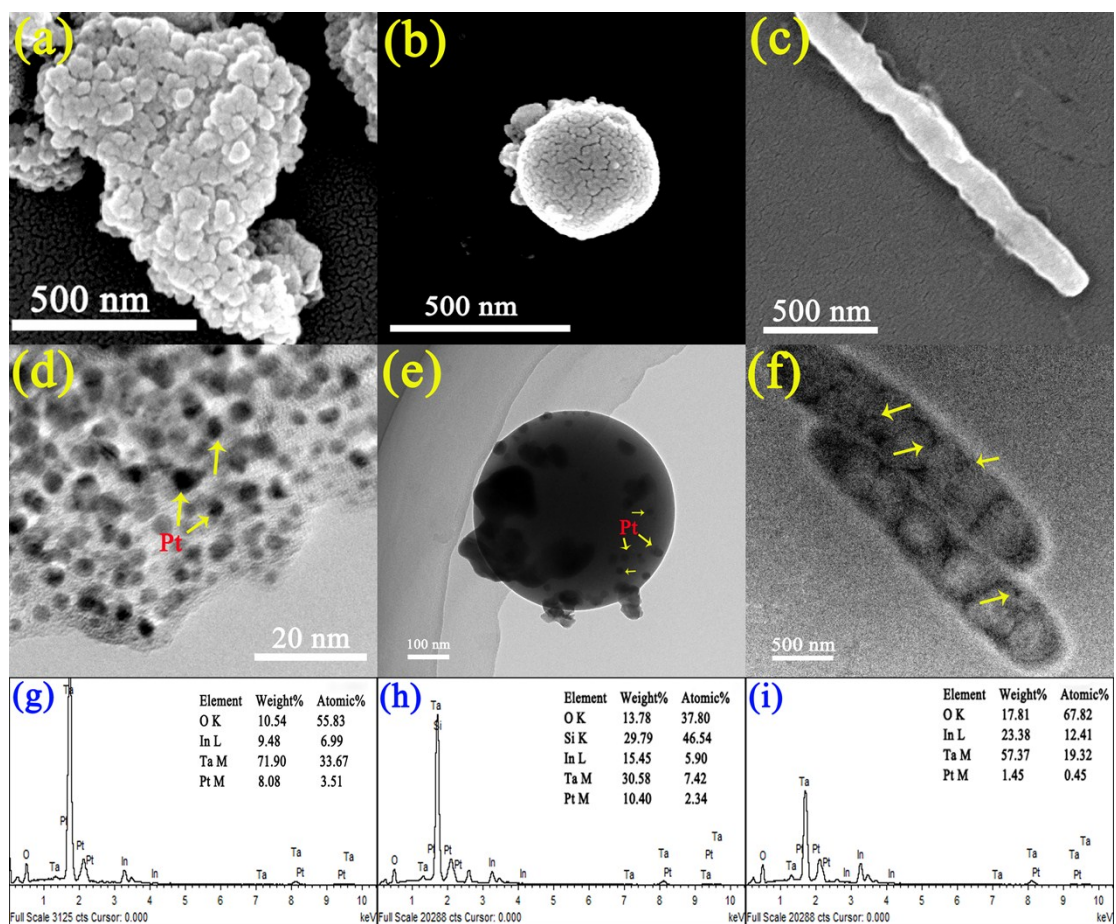

**Fig. S2.** SEM images of InTaO<sub>4</sub> nanoparticles (a), SiO<sub>2</sub>@InTaO<sub>4</sub> nanospheres (b), and InTaO<sub>4</sub> nanofibers (c) after photodeposition of Pt; TEM images of InTaO<sub>4</sub> nanoparticles (d), SiO<sub>2</sub>@InTaO<sub>4</sub> nanospheres (e), and InTaO<sub>4</sub> nanofibers (f) after photo photodeposition of Pt; EDS spectra of InTaO<sub>4</sub> nanoparticles (g), SiO<sub>2</sub>@InTaO<sub>4</sub> nanospheres (h), and InTaO<sub>4</sub> nanofibers (i) after photo photodeposition of Pt.

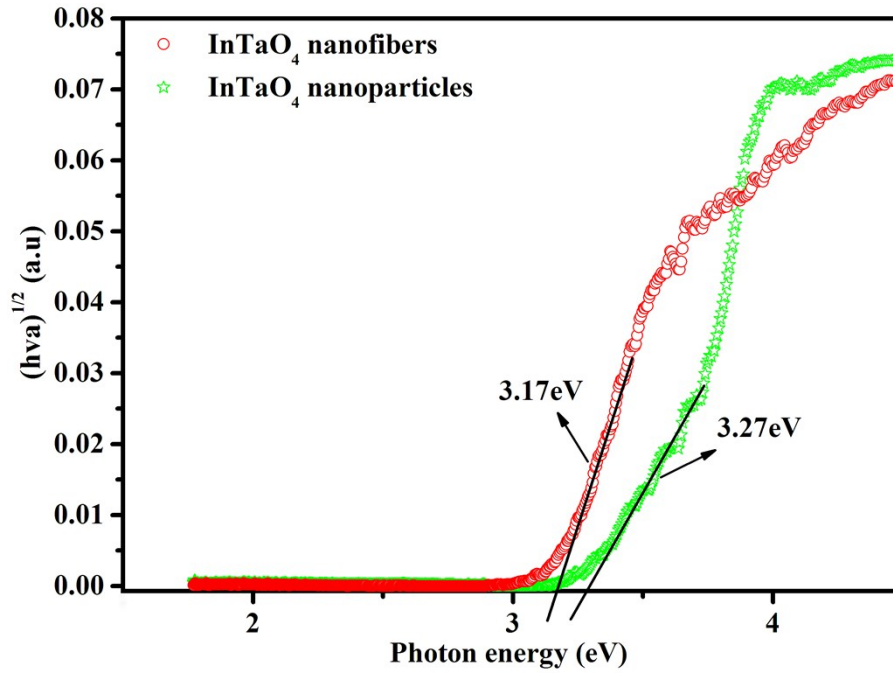

**Fig. S3.** The band gaps of InTaO<sub>4</sub> nanofibers and InTaO<sub>4</sub> nanoparticles were determined to be 3.17 eV and 3.27 eV, respectively.

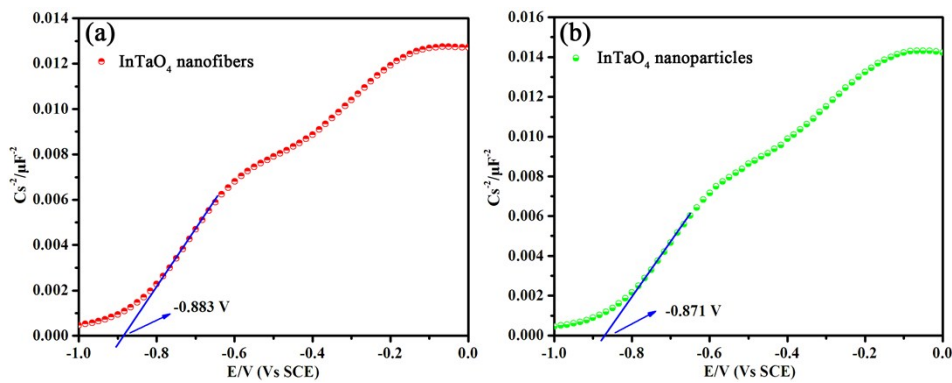

**Fig. S4.** Mott Schottky plots of (a) InTaO<sub>4</sub> nanofibers and (b) InTaO<sub>4</sub> nanoparticles electrodes using 0.5M Na<sub>2</sub>SO<sub>4</sub> as electrolyte at frequency of 1000 Hz.
